# Supplementary material
Source: Springer Nature journal article supplement (https://www.springermedizin.de/resource/supplementary/12968_2008_484_MOESM2_ESM.pdf/9579088)

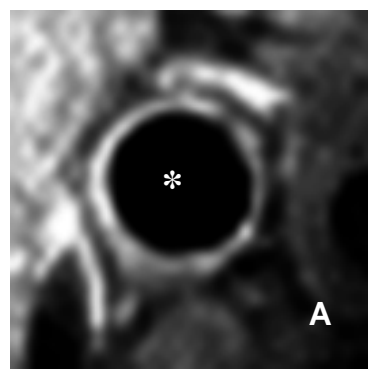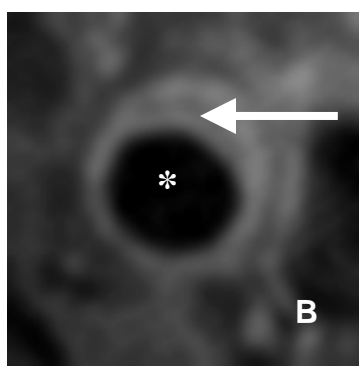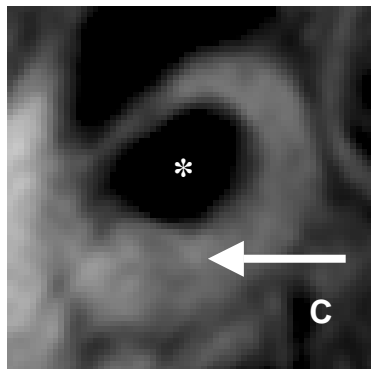

Supplement: MOESM2 [file 9579088]
